# Supplementary material
Source: Springer Nature journal article supplement (https://www.springermedizin.de/resource/supplementary/13054_2011_9909_MOESM3_ESM.pdf/9707184)

Potential for recruitment: 48%

Relative response: 98%

Baseline PEEP

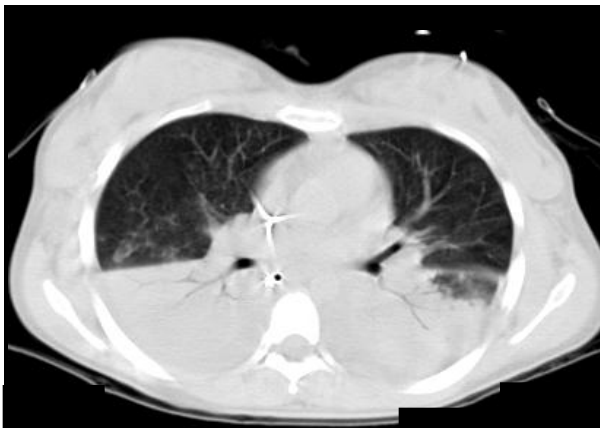

Maximum PEEP

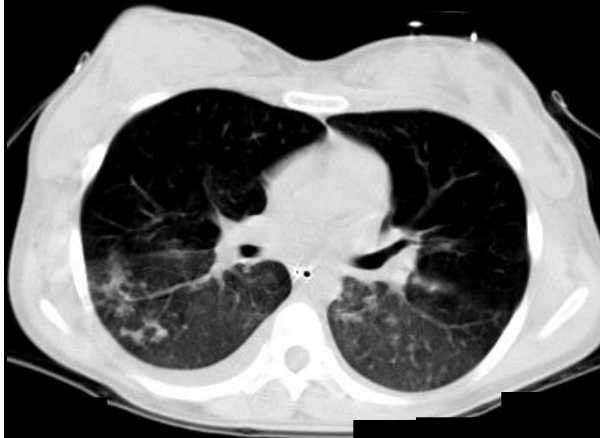

Titrated PEEP

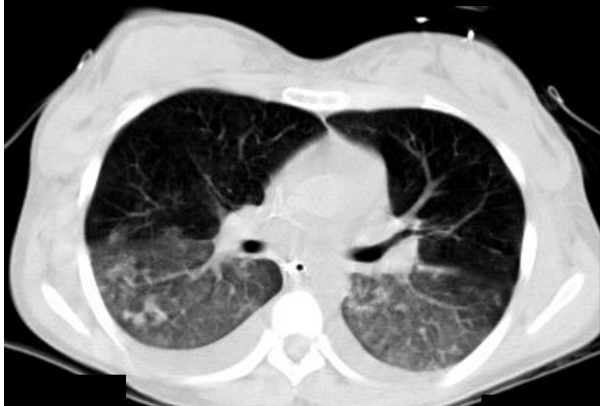

Potential for recruitment: 63%

Relative response: 82%

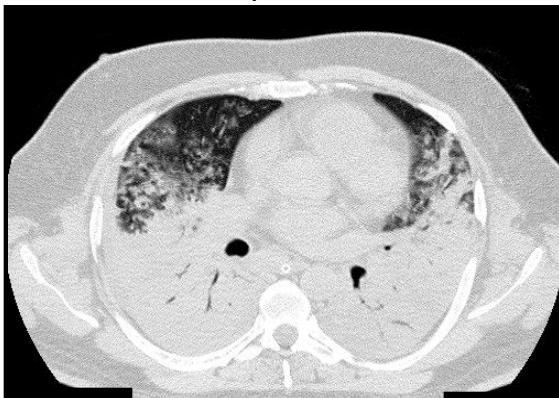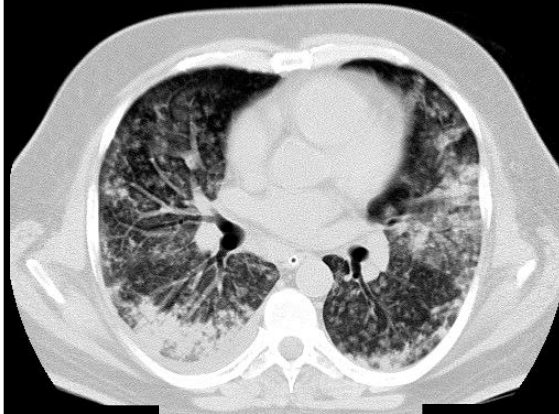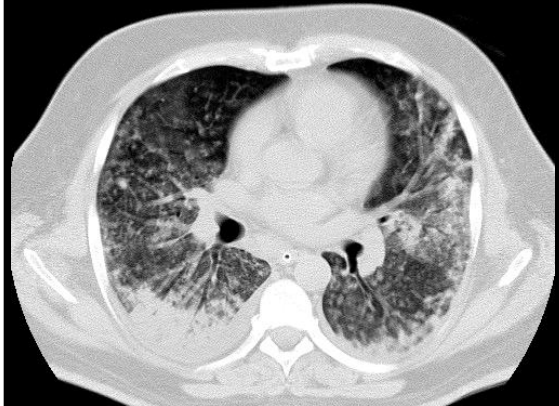

Potential for recruitment: 36%

Relative response: 45%

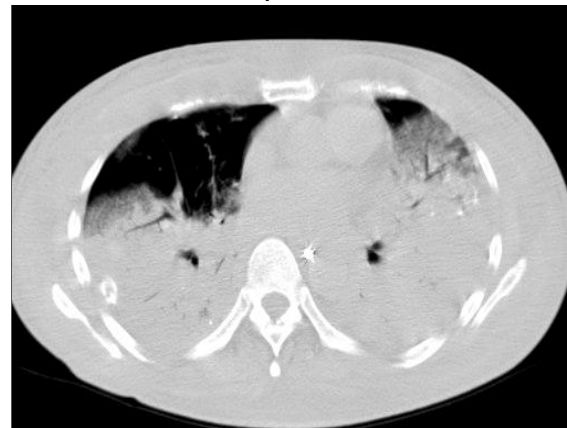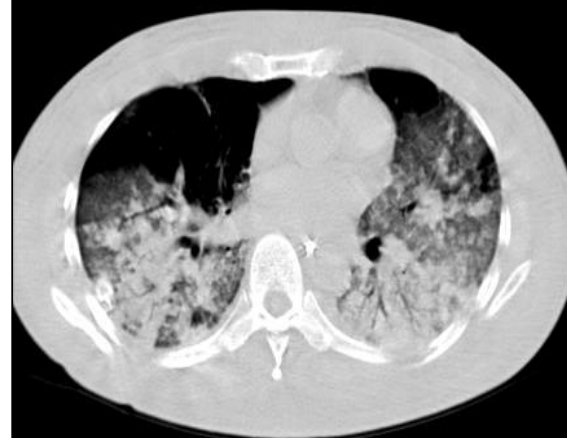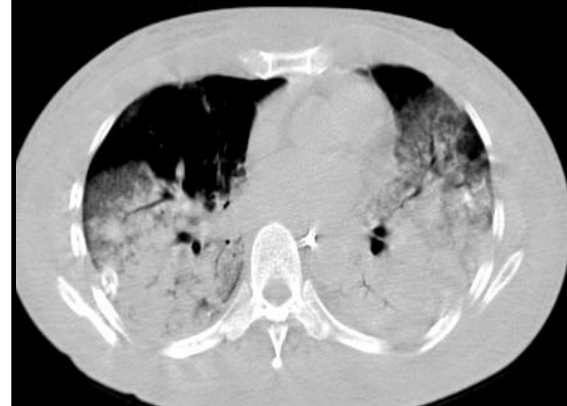

Supplement: MOESM3 [file 9707184]
